# Supplementary material for: Staphylococcus aureus biofilm organization modulated by YycFG two-component regulatory pathway
Source: Springer Nature journal article supplement (doi:10.1186/s13018-018-1055-z), 2019-01-08
Supplement: MOESM1 [file 16385360]

1 **Appendix and Supplementary materials**

2 **Methods and material**

3 ***DNA extraction, sequencing and bioinformatics analyses***

4 Tissue specimens were centrifuged and the pellets were treated with 1% SDS and 50µg/mL proteinase K (Boehringer, Mannheim, Germany)  
5 at 48°C overnight. Total DNA was extracted with phenol/chloroform and precipitated in 100% ethanol. The pelleted DNA was washed twice in  
6 70% ethanol, dissolved in 10mM TRIS buffer (pH 8), and stored at -20°C. An amplicon library from clinical specimens was created by PCR  
7 amplification with unique barcoded primers specific to the 16S rRNA V3-V4 gene region; the 338F and 806R primer pair, which contained the 30-  
8 mer 5' -end adapter sequence required for Illumina Hiseq System was used.

9 ***Bacterial strains and growth conditions***

10 *S. aureus* strains were cultured as described previously (23).on tryptic soy agar (TSA) or in broth (TSB) (Oxoid, Basingstoke, United Kingdom)  
11 containing 0.5% glucose. Methicillin sodium (50 µg/mL) was added to the media when necessary. The strains were cultured to mid-exponential  
12 phase (optical density at 600 nm [OD<sub>600</sub>] = 0.3) in TSB medium for RNA extraction. To propagate the ATCC29213 and MRSA strains, 50µl of mid-  
13 log-phase cells were inoculated in triplicates into 1mL TSB broth containing 0.5% glucose.

14 ***Isolation of RNA and cDNA reverse transcription for RT-PCR assays***

15 Briefly, the different strains were cultured overnight in TSB medium containing 0.5% glucose and supplemented with 50 µg/mL methicillin  
16 sodium when necessary, diluted with fresh media and again cultured to mid-exponential phase ([OD<sub>600</sub>] = 0.3). Total RNA was extracted using a  
17 MasterPure™ RNA purification Kit (Epicentre Technologies, Epicentre, Madison, WI, USA) in accordance with the recommendations of the  
18 manufacturer. Contaminating genomic DNA was removed by digestion with Turbo RNase-free DNase I (Ambion) according to the manufacturer's  
19 instructions.

20 ***Transcription analysis by quantitative RT-PCR***

21 Real-time PCR was carried out with Quantitect SYBR-Green PCR kit (QIAGEN, Valencia, CA) and Roche Applied LightCycler480 (Roche,  
22 Rotkreuz, Switzerland). For each RT-PCR reaction, 20µL of master mixture containing 10µL of SYBR Premix Ex TaqII, 0.5µL of 20µM PCR Forward  
23 Primer, 0.5µL of 20µM PCR Reverse Primer, 2.0µL of template cDNA, and 6.0µL of deionized water was placed in each well. The conditions for RT-  
24 PCR were as follows: initial denaturation at 95°C for 3 min, followed by 40 cycles each of 5s denaturation at 95°C, 30s primer annealing at 60°C,  
25 and dissociation. All reactions were carried out in triplicates. Threshold cycle values (CT) were quantified and the expression of each gene was  
26 normalized relative to that of 16sR gene used as an internal reference. Data were calculated according to the  $2^{-\Delta\Delta CT}$  method. The differences

27 between the expression levels of various genes were considered significant at a cut-off of 2-fold change to baseline.

### 28 ***Detection of bacterial growth***

29 The bacterial strains were cultured at 37°C in TSB medium and growth curves were plotted by measuring OD<sub>600</sub> at one hour intervals. Each  
30 sample was technically replicated in three times. The data represents for the average values of OD<sub>600</sub> absorbance. *S. aureus* biofilm growth was  
31 established as follows: glass cover slips were placed inside 12-well plates, and each well was inoculated with 10µL exponential phase culture  
32 (OD<sub>600</sub> = 0.3) in 1 mL TSB broth containing 0.5% glucose. After anaerobic incubation for 24h, the planktonic suspensions were removed and the  
33 biofilms growing on the cover slips were washed three times with phosphate-buffered saline (PBS, pH 7.2) to remove non-adherent cells. The  
34 biofilms were washed twice with PBS buffer and fixed with 2.5% glutaraldehyde for 4 hours. They were then serially dehydrated with increasingly  
35 concentrated ethanol solutions (30%, 50%, 70%, 80%, 95%, and 100%), dried to critical-point with liquid CO<sub>2</sub>, and coated with gold powder.  
36 Scanning electron micrographs of the biofilms were then obtained with an SEM (Inspect Hillsboro, OR, USA).

37

### 38 **Clinical MRSA strains were identified by 16S rRNA sequencing**

39 **1497bp**

40 CTGGCTCAGGATGAACGCTGGCGGCGTGCCTAATACATGCAAGTCGAGCGAACGGACGAGAAGCTTGCTTCTCTGATGTTAGCGGCGGACGGGTGAGTAACACGTGGATAACCTACCTATAAGACTGGGATAACTTCGGG  
41 AAACCGGAGCTAATACCGGATAATATTTGAACCGCATGGTTCAAAGTGAAAGACGGTCTTGCTGTCACTTATAGATGGATCCGCGCTGCATTAGCTAGTTGGTAAGGTAACGGCTTACCAAGGCAACGATGCATAGCCGA  
42 CCTGAGAGGGTGATCGGCCACACTGGAAGTGAAGACACGGTCCAGACTCCTACGGGAGGCAGCAGTAGGGAATCTTCCGCAATGGGCGAAAGCCTGACGGAGCAACGCCGCTGAGTGATGAAGGTCTTCGGATCGTAA  
43 AACTCTGTTATTAGGGAAGAACATATGTGTAAGTAACTGTGCACATCTTGACGGTACCTAATCAGAAAGCCACGGCTAACTACGTGCCAGCAGCCGCGTAATACGTAGGTGGCAAGCGTTATCCGGAATTATTGGGCGTAA  
44 AGCGCGCTAGGCGGTTTTTAAGTCTGATGTGAAAGCCCACGGCTCAACCGTGGAGGGTCATTGGAACTGGAAAATTGAGTGCAGAAGAGGAAAGTGAATTCCATGTGTAGCGGTGAAATGCGCAGAGATATGG  
45 AGGAACACCAGTGGCGAAGGCGACTTTCTGGTCTGTAAGTACGCTGATGTGCGAAAGCGTGGGGATCAAACAGGATTAGATACCCTGGTAGTCCACGCCGTAACGATGAGTGCTAAGTGTAGGGGGTTCCGCCCT  
46 TAGTGCTGCAGCTAACGCATTAAGCACTCCGCCTGGGAGTACGACCGCAAGGTTGAACTCAAAGGAATTGACGGGGACCCGCACAAGCGGTGGAGCATGTGGTTAATTCGAAGCAACGCGAAGAACCTTACCAAT  
47 CTTGACATCCTTTGACAACTCTAGAGATAGAGCTTTCCCTTCGGGGGACAAAGTGACAGGTGGTGCATGTTGTCGTGAGCTCGTGTGAGATGTTGGGTTAAGTCCCGCAACGAGCGCAACCCTTAAGCTTAGTTGC  
48 CATCATTAAGTTGGGCACTCTAAGTTGACTGCCGTGACAAACCGGAGGAAGGTGGGGATGACGTCAAATCATCATGCCCTTATGATTTGGGCTACACACGTGCTACAATGGACAATACAAAGGGCAGCGAAACCGCGA  
49 GGTCAAGCAAATCCATAAAGTTGTTCTCAGTTCGGATTGTAGTCTGCAACTCGACTACATGAAGCTGGAATCGCTAGTAATCGTAGATCAGCATGCTACGGTGAATACGTTCCCGGGTCTTGACACACCGCCCGTCACACC  
50 ACGAGAGTTTGTAACACCCGAAGCCGGTGGAGTAACCTTTAGGAGCTAGCCGTCGAAGGTGGGACAAATGATTGGGGTGAAGTCGTAACAAGG

51

52

53

54

55

| Description                                                                  | Max score | Total score | Query cover | E value | Ident | Accession         |
|------------------------------------------------------------------------------|-----------|-------------|-------------|---------|-------|-------------------|
| <u>Staphylococcus aureus strain FORC_045, complete genome</u>                | 2765      | 13794       | 100%        | 0.0     | 100%  | <u>CP017115.1</u> |
| <u>Staphylococcus aureus strain ISU935, complete genome</u>                  | 2765      | 16508       | 100%        | 0.0     | 100%  | <u>CP017090.1</u> |
| <u>Staphylococcus aureus DNA, almost complete genome, strain: No.10</u>      | 2765      | 16554       | 100%        | 0.0     | 100%  | <u>AP015012.1</u> |
| <u>Staphylococcus aureus strain FORC_039, complete genome</u>                | 2765      | 16565       | 100%        | 0.0     | 100%  | <u>CP015817.1</u> |
| <u>Staphylococcus aureus strain BA01611, complete genome</u>                 | 2765      | 13776       | 100%        | 0.0     | 100%  | <u>CP019945.1</u> |
| <u>Staphylococcus aureus subsp. aureus strain ATCC 6538, complete genome</u> | 2765      | 16560       | 100%        | 0.0     | 100%  | <u>CP020020.1</u> |

| Description                                                               | Max score | Total score | Query cover | E value | Ident | Accession         |
|---------------------------------------------------------------------------|-----------|-------------|-------------|---------|-------|-------------------|
| <u>Staphylococcus aureus strain SR434, complete genome</u>                | 2765      | 16543       | 100%        | 0.0     | 100%  | <u>CP019563.1</u> |
| <u>Staphylococcus aureus strain FORC_026, complete genome</u>             | 2765      | 16554       | 100%        | 0.0     | 100%  | <u>CP013132.1</u> |
| <u>Staphylococcus aureus subsp. aureus strain 2148.N, complete genome</u> | 2765      | 16534       | 100%        | 0.0     | 100%  | <u>CP016856.1</u> |
| <u>Staphylococcus aureus strain 08-02119, complete genome</u>             | 2765      | 16560       | 100%        | 0.0     | 100%  | <u>CP015645.1</u> |
| <u>Staphylococcus aureus strain NCCP14562, complete genome</u>            | 2765      | 13811       | 100%        | 0.0     | 100%  | <u>CP013955.1</u> |

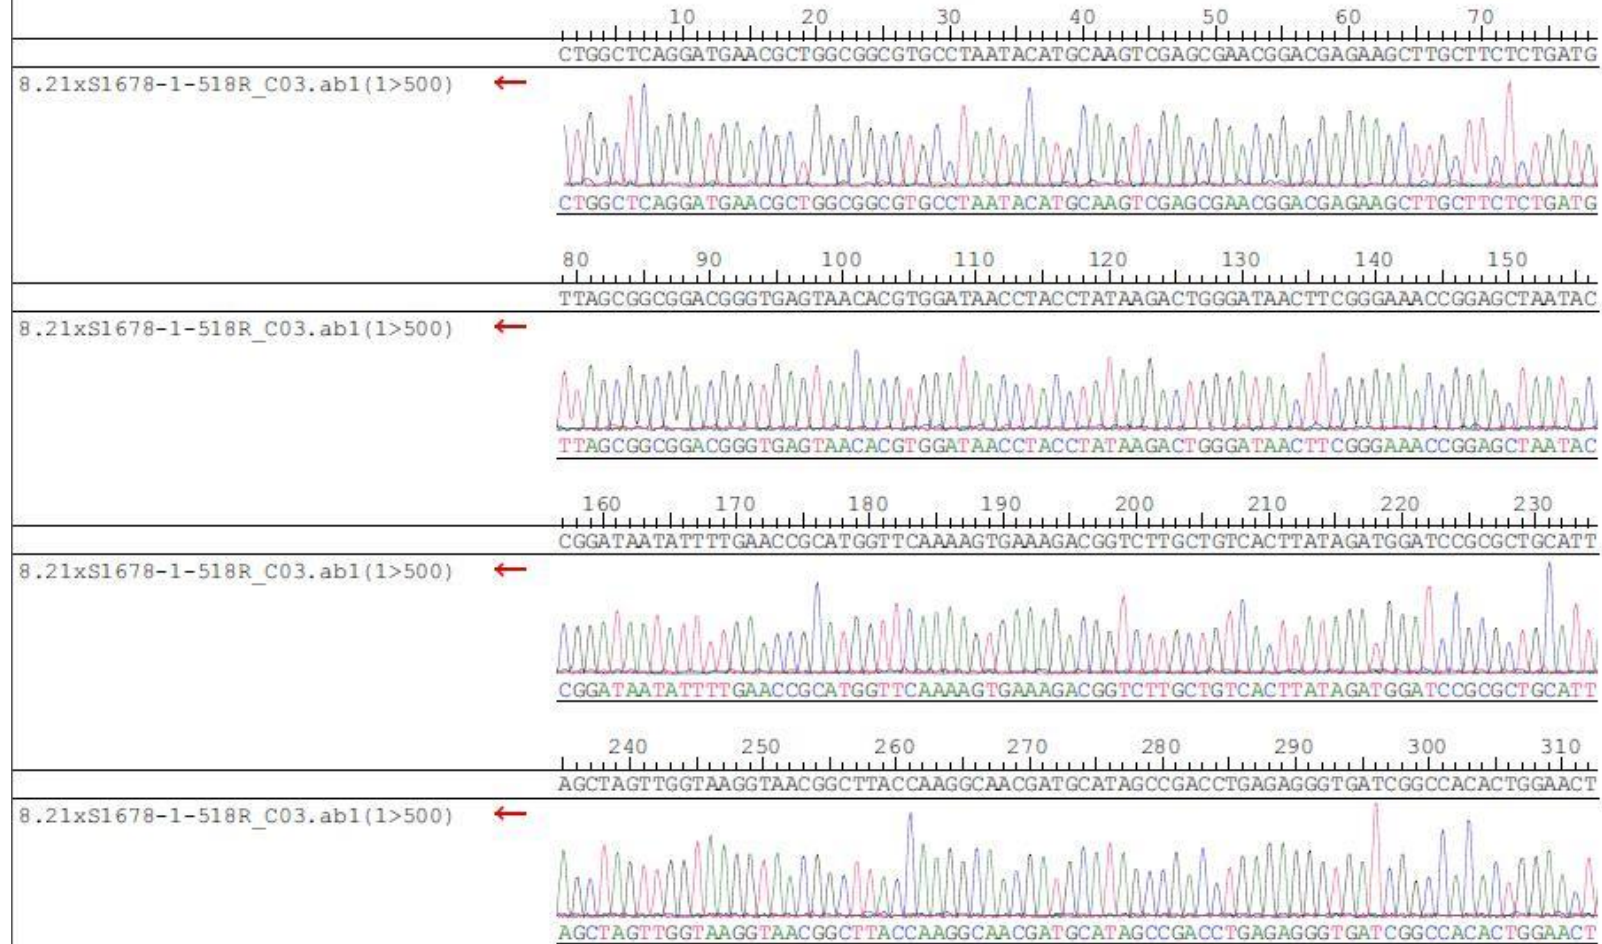

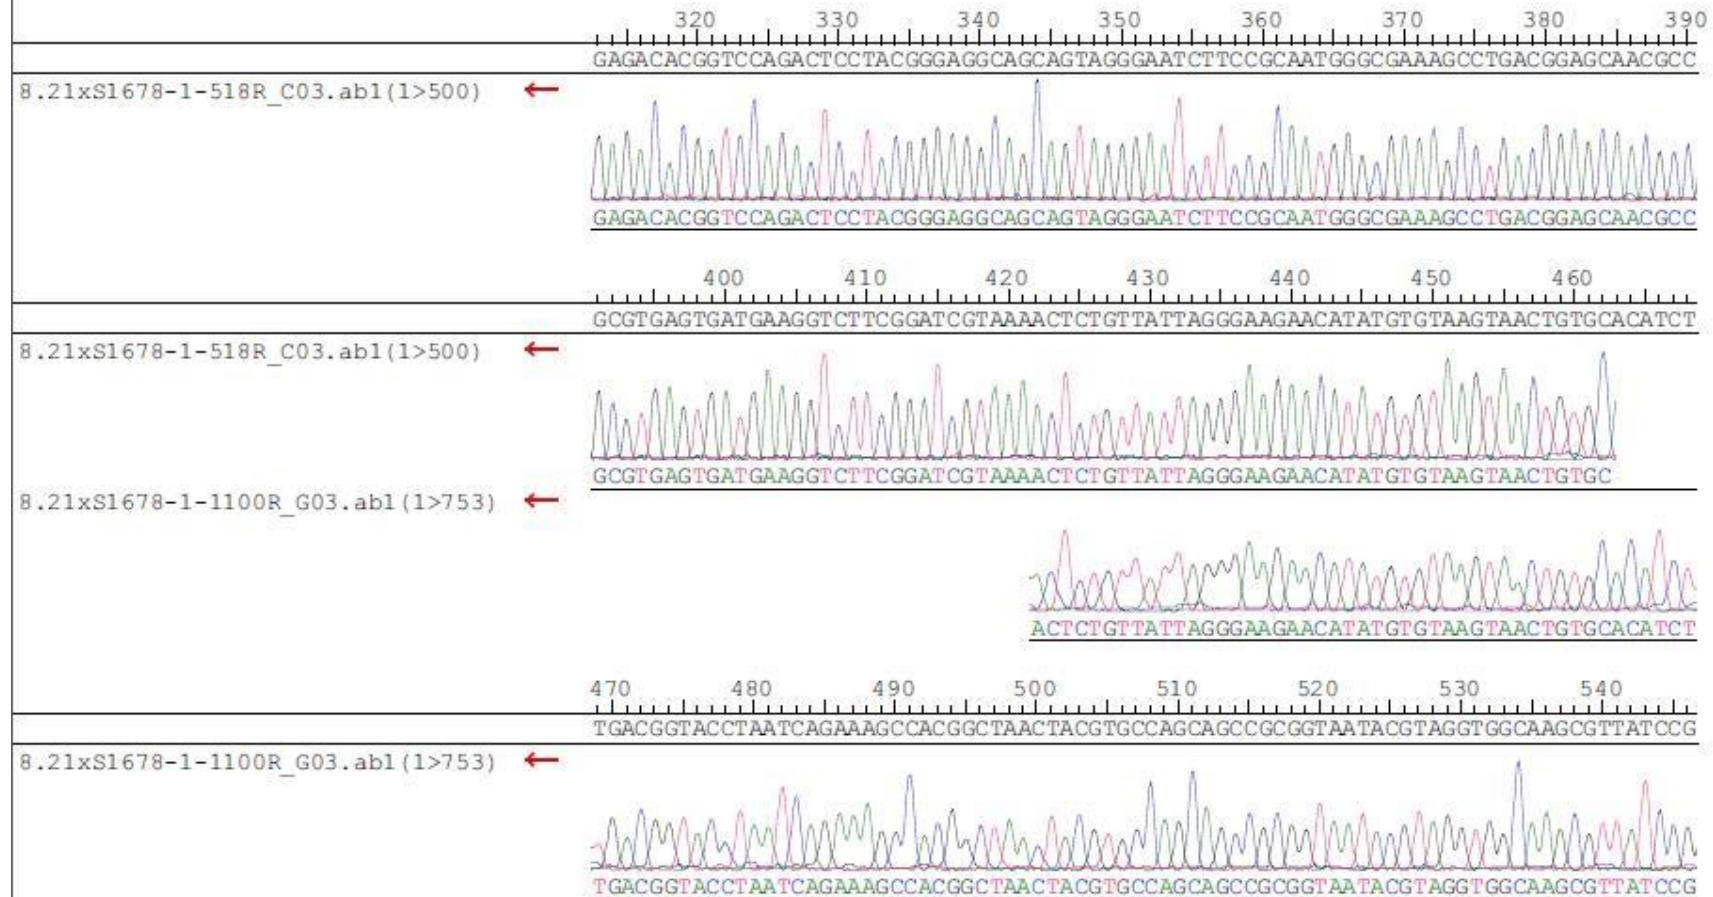



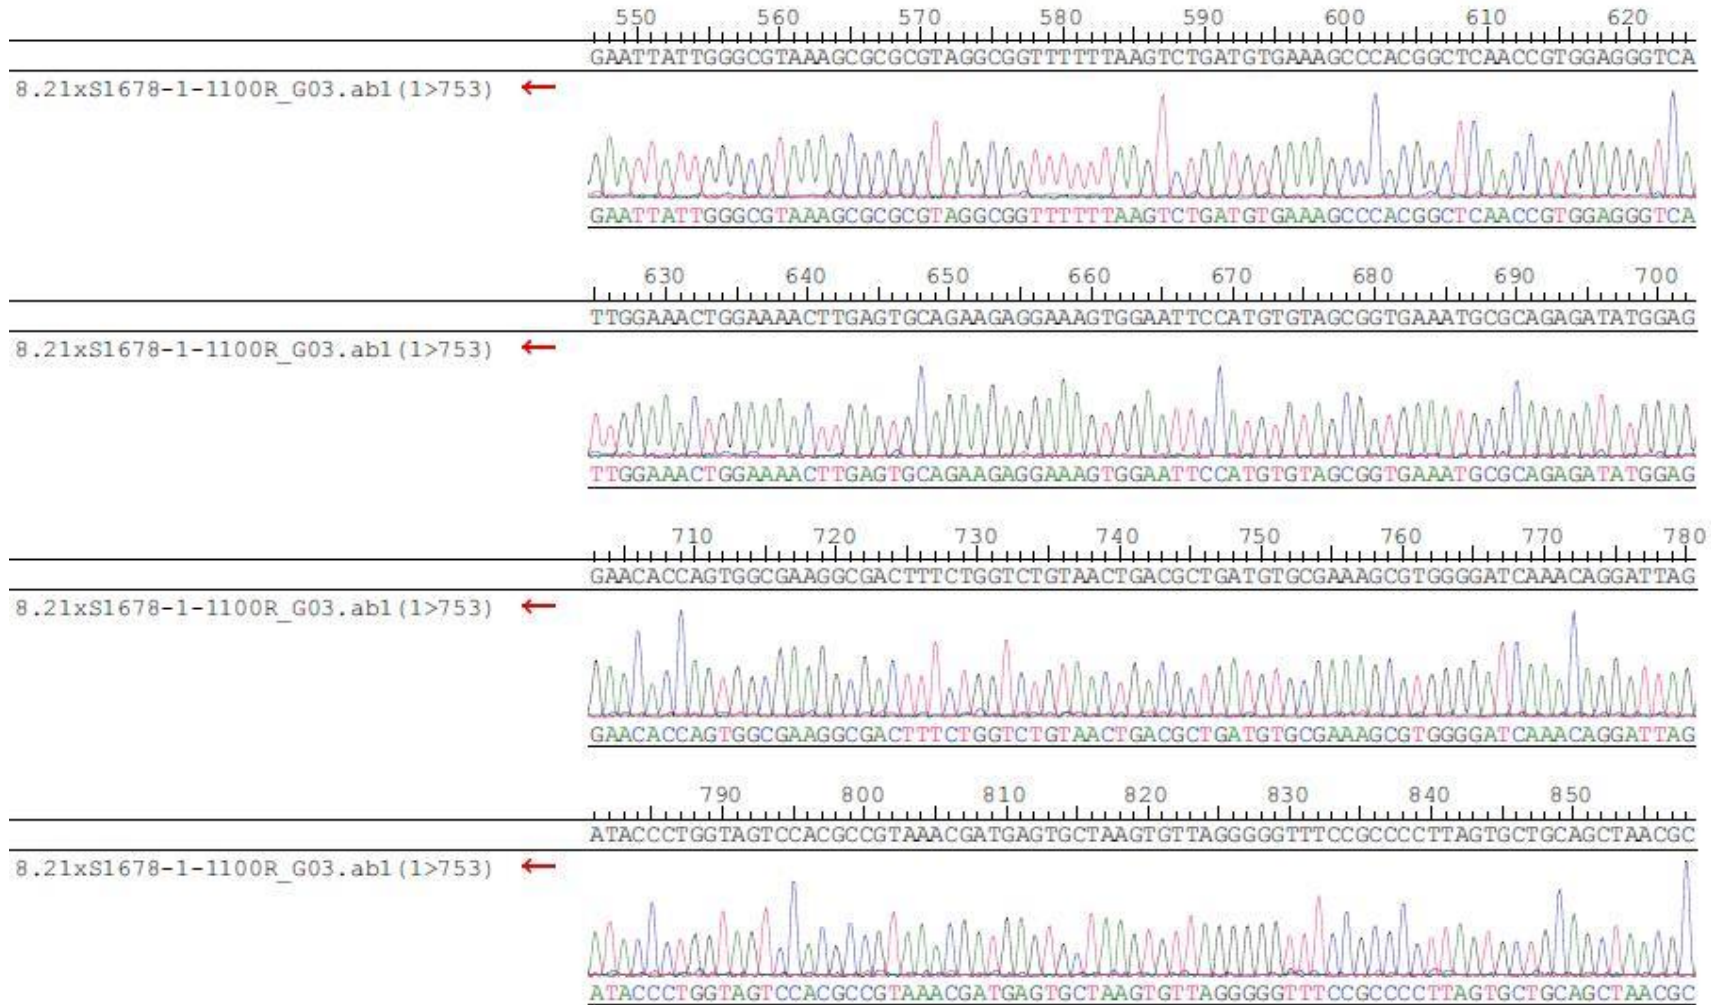

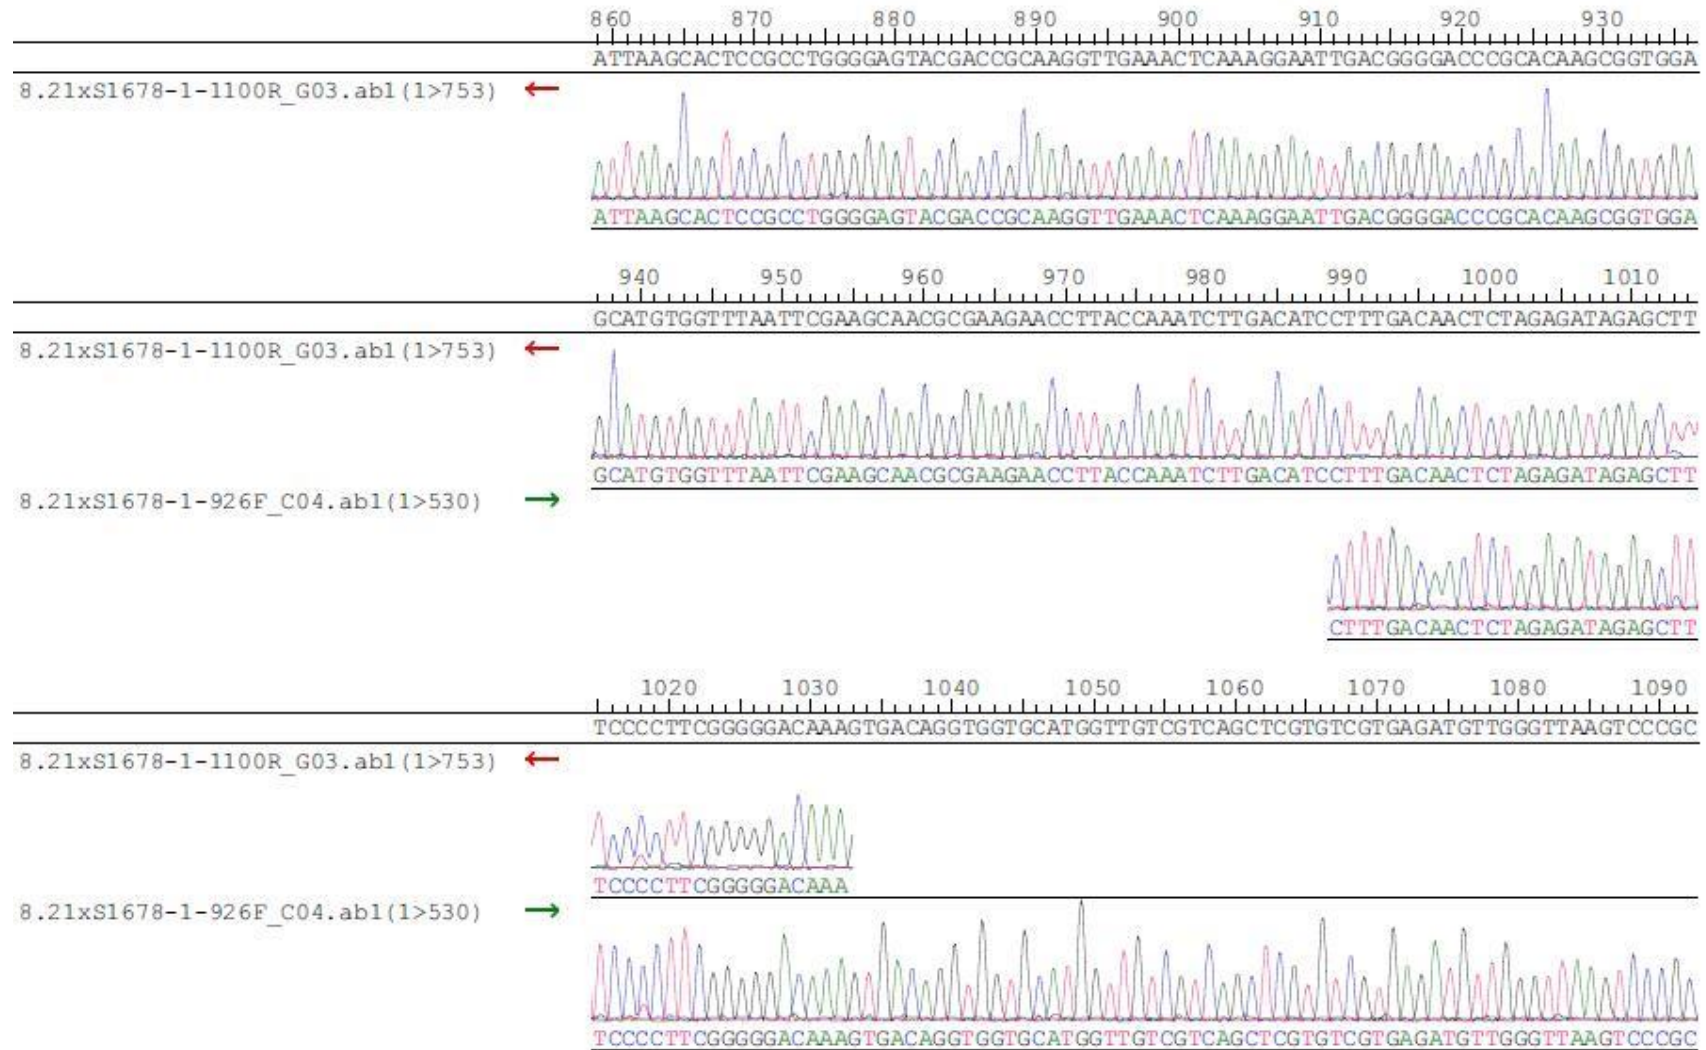

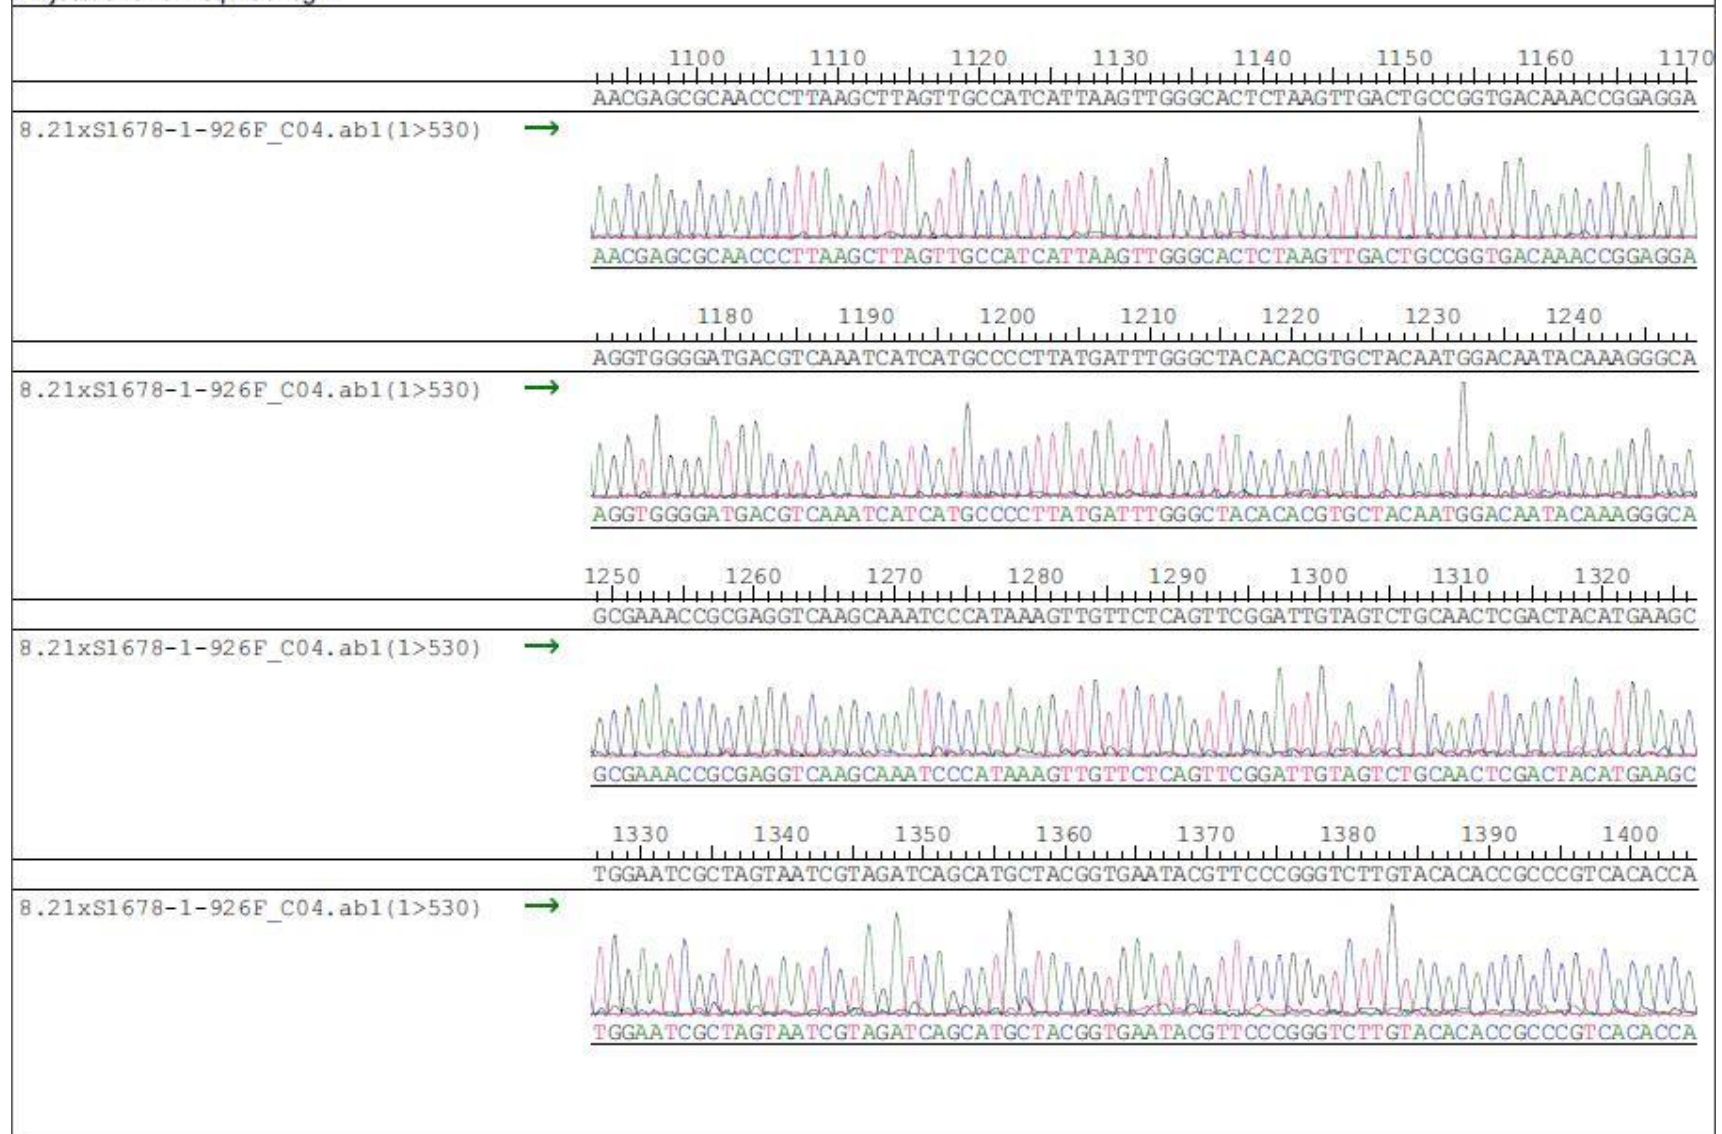

1410 1420 1430 1440 1450 1460 1470 1480  
CGAGAGTTTGTAAACCCGAAGCCGGTGGAGTAACTTTTAGGAGCTAGCCGTCGAAGGTGGGACAAATGATTGGGGT

8.21xS1678-1-926F\_C04.ab1(1>530) →

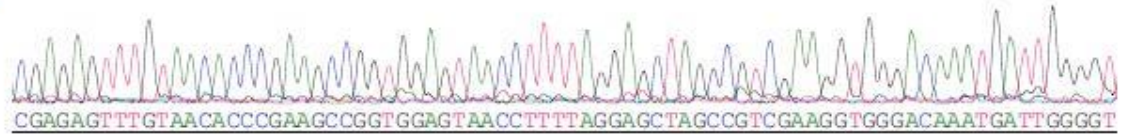

1490  
GAAGTCGTAACAAGG

8.21xS1678-1-926F\_C04.ab1(1>530) →

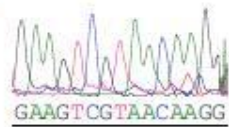

**Table 1. Sequences of primers used for qRT-PCR analysis**

| <b>Primers</b> | <b>sequence 5'-3' (Forward/Reverse)</b> | <b>Reference</b> |
|----------------|-----------------------------------------|------------------|
| <b>RT-qPCR</b> |                                         |                  |
| <i>icaA</i>    | 5'- GATTATGTAATGTGCTTGGA -3'/           | This study       |
|                | 5'- ACTACTGCTGCGTTAATAAT - 3'           |                  |
| <i>icaD</i>    | 5'- ATGGTCAAGCCCAGACAGAG -3'/           | This study       |
|                | 5'- CGTGTTTTCAACATTTAATGCAA -3'         |                  |
| <i>yycF</i>    | 5' - TGGCGAAAGAAGACATCA -3'/            | This study       |
|                | 5' – AACCCGTTACAAATCCTG- 3'             |                  |
| <i>yycG</i>    | 5' - CGGGGCGTTCAAAAGACTTT -3'/          | This study       |
|                | 5' - TCTGAACCTTTGAACACACGT -3'          |                  |
| <i>yycH</i>    | 5' - TCAGTCAGGCGAGCTAACAT -3'/          | This study       |
|                | 5' –CGCTAAGCTTGAACGTACAGA -3'           |                  |
| <i>16sr</i>    | 5' - GTAGGTGGCAAGCGTTATCC -3'/          | This study       |
|                | 5' –CGCACATCAGCGTCAACA-3'               |                  |

**Table2. Demographical and clinical data of patients with MRSA infections.**

| Patient | Date of MRSA<br>isolation | Age | Sex    | Etiology      | Infection site  |
|---------|---------------------------|-----|--------|---------------|-----------------|
| 1       | May 2016                  | 44  | Male   | Trauma        | Left tibial     |
| 2       | May 2016                  | 61  | Male   | Diabetic foot | Right calcaneus |
| 3       | May 2016                  | 32  | Female | Trauma        | Right tibial    |
| 4       | May 2016                  | 55  | Female | Trauma        | Right calcaneus |
| 5       | July 2016                 | 28  | Female | Diabetic foot | Left calcaneus  |
| 6       | July 2016                 | 45  | Female | Trauma        | Right femur     |
| 7       | July 2016                 | 39  | Male   | Trauma        | Left tibial     |
| 8       | July 2016                 | 62  | Male   | Trauma        | Left femur      |
| 9       | July 2016                 | 28  | Male   | Trauma        | Right calcaneus |
| 10      | September 2016            | 33  | Male   | Trauma        | Right tibial    |
| 11      | September 2016            | 54  | Male   | Trauma        | Left tibial     |
| 12      | October 2016              | 23  | Female | Trauma        | Left femur      |
| 13      | October 2016              | 35  | Male   | Trauma        | Left calcaneus  |

**A**

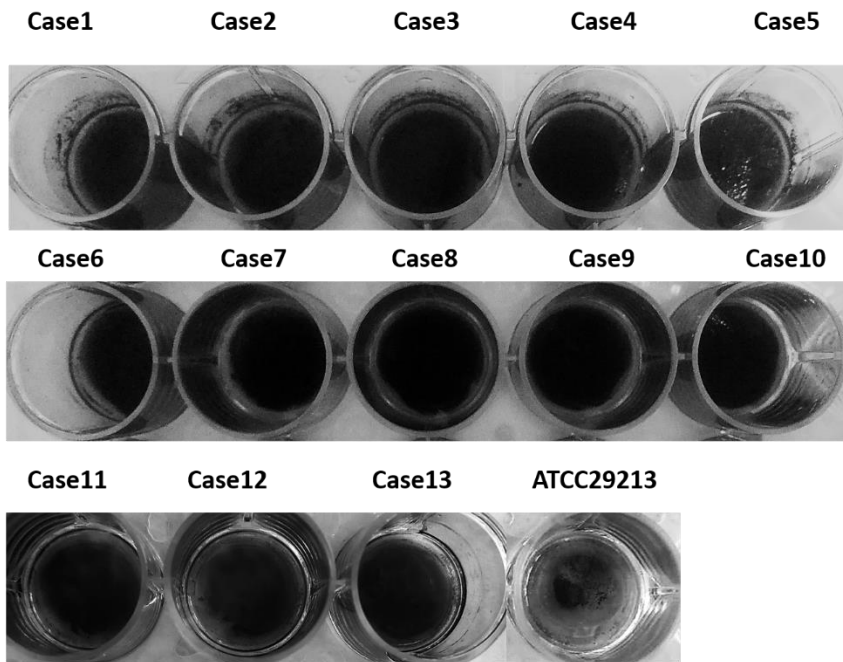

**B**

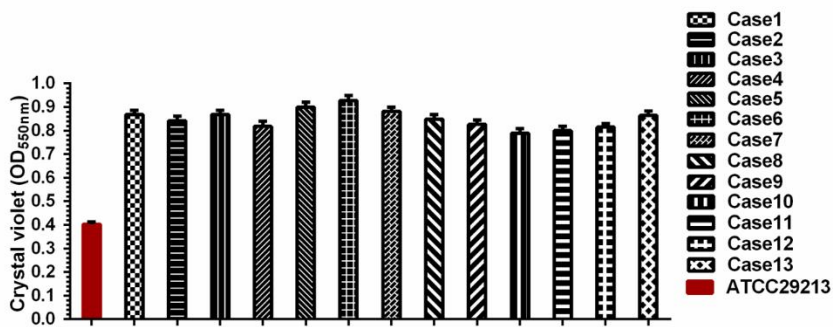

**SFig.1 Initial comparison of ATCC29213 and MRSA strains on morphology of *S. aureus***

**(A)** *S. aureus* biomass was quantified by crystal violet staining and the MRSA strains form more robust biofilm. **(B)** For crystal violet microtiter assay for determining biofilm biomass, the optical density at 550 nm was read. Data represent ten biological replicates and are

presented as the mean  $\pm$  standard deviation.

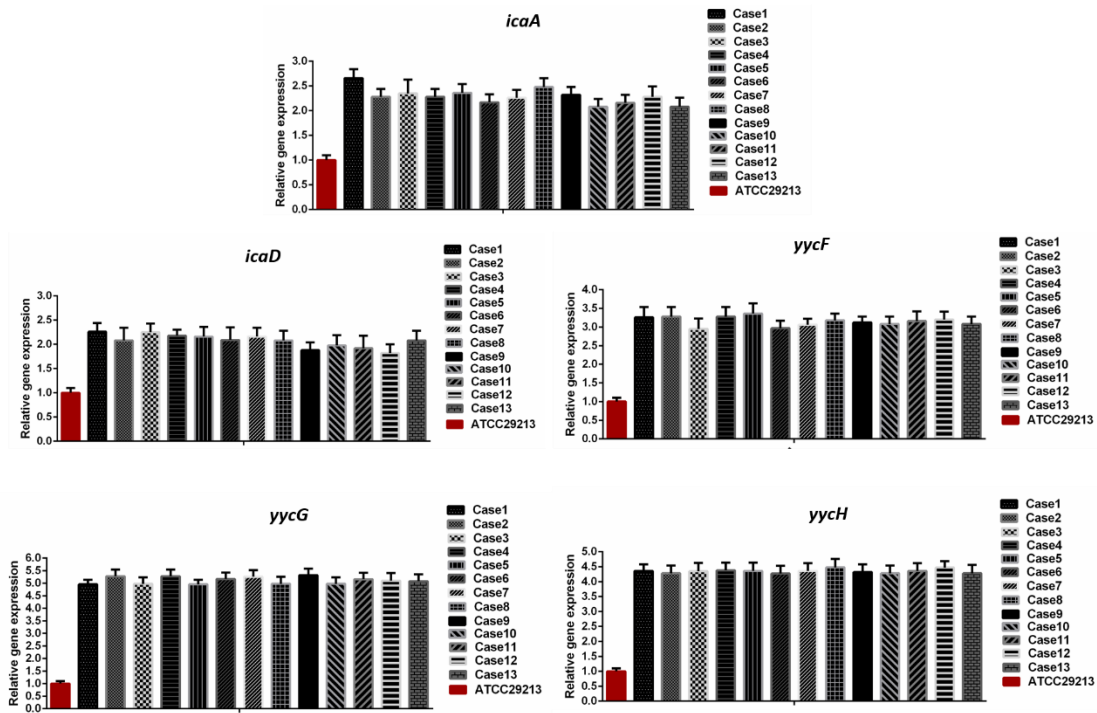

SFig.2 The expression of virulent-associated genes and phenotypic characteristics of *S. aureus*.
